# Supplementary material for: Strong pathogen competition in neonatal gut colonisation
Source: PubMed Central journal article supplement (PMC9715557; doi:10.1038/s41467-022-35178-5), 2022-12-01
Supplement: 41467_2022_35178_MOESM3_ESM.pdf [file 41467_2022_35178_MOESM3_ESM.pdf]

## Description of Additional Supplementary Files

**Supplementary Data 1** contains information about the *Enterococcus faecalis* strains analysed in the manuscript that were identified as harbouring antibiotic resistance-conferring genes to major antibiotic classes

**Supplementary Data 2** contains the list of identified lineages (bins) in each sample that received high or very high score (1 or 2) from demix\_check. These bins are called reliable identifications in the manuscript.
